# Supplementary material
Source: PubMed Central journal article supplement (PMC3624032)
Supplement: NIHMS452784-supplement-01.pdf [file NIHMS452784-supplement-01.pdf]

1 **Supplement Table I (for online publication): Cross-sectional results in men:**

2 Thigh muscle strength in knees with and without radiographic progression (i.e. change in  
3 minimum medial radiographic joint space width [JSW] between year 2 and 4 follow-up).

|    | Time               | Progressor  | Non-progr.  | Difference-          | P <sup>1</sup> | P <sup>2</sup> |
|----|--------------------|-------------|-------------|----------------------|----------------|----------------|
|    |                    | Mean SD     | Mean SD     | Mean [95% CI]        |                |                |
| 7  | <i>All men</i>     | (N=253)     | (N=358)     |                      |                |                |
| 8  | E Max Y2           | 421.6 127.4 | 409.7 113   | 11.9 [-7.4, +31.1]   | 0.24           | 0.19           |
| 9  | F Max Y2           | 171.2 69.2  | 169.5 66.1  | 1.8 [-9.1, +12.7]    | 0.75           | 0.69           |
| 10 | E Norm Y2          | 4.63 1.45   | 4.57 1.29   | 0.06 [-0.16, +0.27]  | 0.63           | 0.22           |
| 11 | F Norm Y2          | 1.87 0.75   | 1.89 0.76   | -0.02 [-0.14, +0.10] | 0.73           | 0.91           |
| 12 | <i>KLG 0/1 men</i> | (N=68)      | (N=129)     |                      |                |                |
| 13 | E Max Y2           | 436.8 116.3 | 431 118.2   | 5.8 [-28.9, +40.6]   | 0.74           | 0.76           |
| 14 | F Max Y2           | 176.2 66.1  | 185.7 69.2  | -9.6 [-29.7, +10.6]  | 0.34           | 0.97           |
| 15 | E Norm Y2          | 4.8 1.4     | 4.9 1.4     | -0.2 [-0.59, +0.24]  | 0.39           | 0.92           |
| 16 | F Norm Y2          | 1.9 0.7     | 2.1 0.8     | -0.2 [-0.46, 0.00]   | 0.041*         | 0.64           |
| 17 | <i>KLG 2/3 men</i> | (N=185)     | (N=229)     |                      |                |                |
| 18 | E Max Y2           | 416.0 131.1 | 397.7 108.3 | 18.3 [-4.9, +41.4]   | 0.13           | 0.10           |
| 19 | F Max Y2           | 169.4 70.3  | 160.3 62.7  | 9.1 [-3.7, +22.0]    | 0.17           | 0.30           |
| 20 | E Norm Y2          | 4.58 1.49   | 4.36 1.17   | 0.21 [-0.04, +0.47]  | 0.11           | 0.07           |
| 21 | F Norm Y2          | 1.86 0.77   | 1.76 0.68   | 0.1 [-0.04, +0.24]   | 0.16           | 0.24           |
| 22 | <i>All men</i>     | (N=253)     | (N=358)     |                      |                |                |
| 23 | E Max BL           | 444.6 135.8 | 437.3 126   | 7.3 [-13.7, +28.3]   | 0.50           | 0.82           |
| 24 | F Max BL           | 188.3 79.7  | 187.7 73.4  | 0.6 [-11.7, +12.9]   | 0.92           | 0.44           |
| 25 | E Norm BL          | 4.86 1.46   | 4.88 1.42   | -0.01 [-0.25, +0.22] | 0.90           | 0.57           |
| 26 | F Norm BL          | 2.05 0.84   | 2.09 0.81   | -0.03 [-0.17, +0.10] | 0.63           | 0.70           |

27 For abbreviations, see Table 2

28
