# Supplementary material
Source: PubMed Central journal article supplement (PMC3624032)
Supplement: NIHMS452784-supplement-02.pdf [file NIHMS452784-supplement-02.pdf]

1 **Supplement Table II (for online publication): Longitudinal results in men:**

2 Longitudinal thigh muscle strength change in knees with and without radiographic progression  
 3 (i.e. change in minimum medial radiographic joint space width [JSW] between year 2 and 4  
 4 follow-up).

| 6  | Time               |       | Progressor     |       | Non-progr.     |       | Difference |                | P <sup>1</sup> | P <sup>2</sup> |
|----|--------------------|-------|----------------|-------|----------------|-------|------------|----------------|----------------|----------------|
| 7  |                    |       | Mean           | SD    | Mean           | SD    | Mean       | [95%CI]        |                |                |
| 8  | <i>All men</i>     |       | <i>(N=253)</i> |       | <i>(N=358)</i> |       |            |                |                |                |
| 9  | E Max              | BL→Y2 | -23.01         | 96.09 | -27.58         | 81.41 | 4.57       | [-9.6, +18.7]  | 0.54           | ^              |
| 10 | F Max              | BL→Y2 | -17.09         | 53.53 | -18.29         | 56.53 | 1.19       | [-7.7, +10.1]  | 0.79           | 0.57           |
| 11 | <i>KLG 0/1 men</i> |       | <i>(N=68)</i>  |       | <i>(N=129)</i> |       |            |                |                |                |
| 12 | E Max              | BL→Y2 | -39.9          | 99.2  | -31.3          | 85.5  | -8.6       | [-35.4, +18.1] | 0.54           | ^              |
| 13 | F Max              | BL→Y2 | -22.2          | 57.1  | -7.3           | 54.3  | -14.9      | [-31.2, +1.5]  | 0.08           | 0.95           |
| 14 | <i>KLG 2/3 men</i> |       | <i>(N=185)</i> |       | <i>(N=229)</i> |       |            |                |                |                |
| 15 | E max              | BL→Y2 | -16.8          | 94.4  | -25.5          | 79.1  | 8.7        | [-8.1, +25.5]  | 0.32           | 0.58           |
| 16 | F max              | BL→Y2 | -15.2          | 52.2  | -24.5          | 56.9  | 9.2        | [-1.4, +19.9]  | 0.09           | 0.81           |
| 17 | <i>All men</i>     |       | <i>(N=227)</i> |       | <i>(N=332)</i> |       |            |                |                |                |
| 18 | E Max              | Y2→Y4 | -6.15          | 75.97 | -11.42         | 74.23 | 5.27       | [-7.4, +17.9]  | 0.42           | 0.19           |
| 19 | F Max              | Y2→Y4 | -9.04          | 45.05 | -7.76          | 47    | -1.27      | [-9.1, +6.6]   | 0.75           | 0.61           |

20 For abbreviations, see Table 3

21
